# Supplementary material
Source: PubMed Central journal article supplement (PMC3708369)
Supplement: supp_M038141_jlr.M038141-1.pdf [file supp_M038141_jlr.M038141-1.pdf]

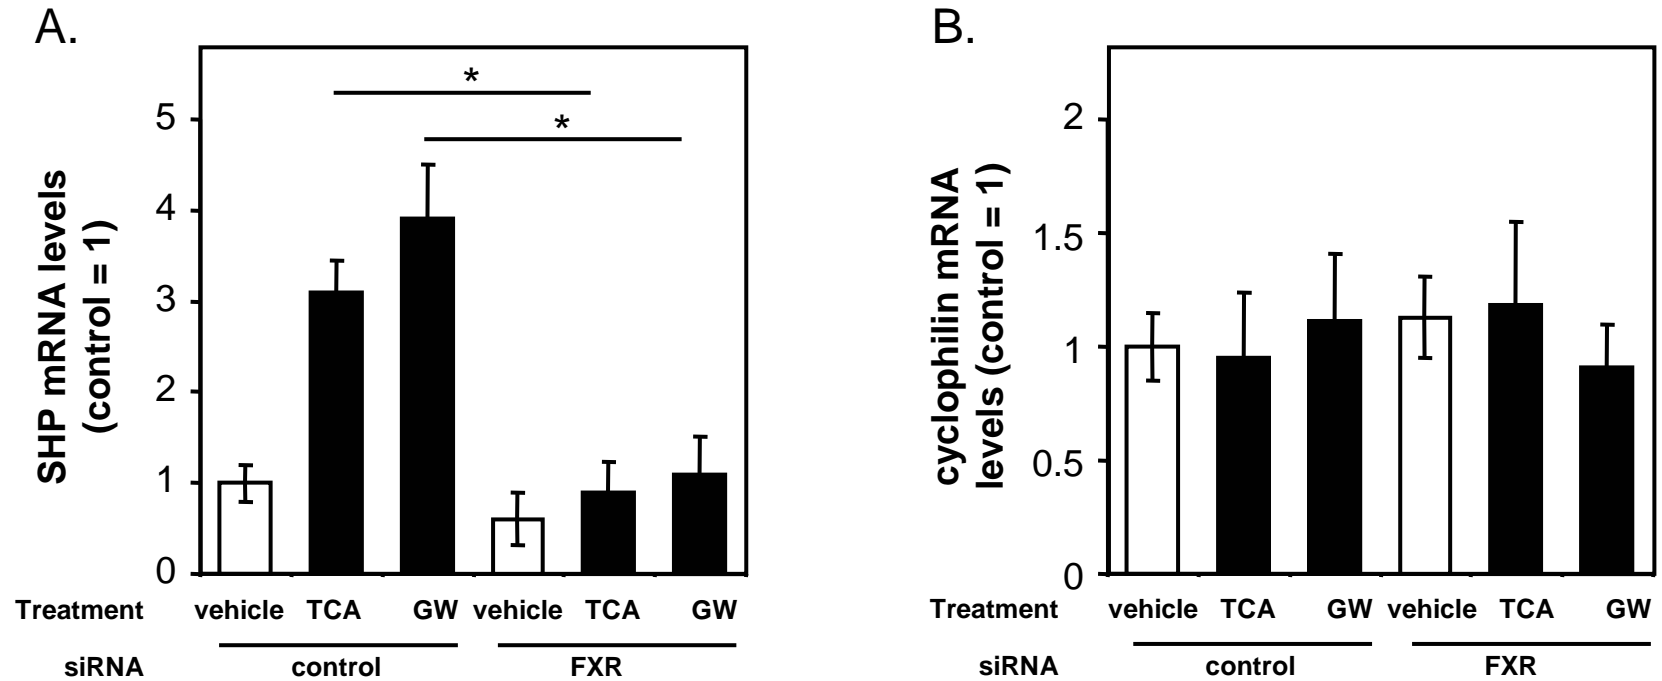

Positive (SHP, panel A) and negative (cyclophilin, panel B) controls for the experiments shown in Figure 3E. Respective mRNA levels in the HepG2-NTCP hepatoma cell line transfected with control siRNA (control) or FXR-specific siRNA (FXR) (see Materials and Methods) and treated with vehicle (open bars), 25  $\mu$ M taurocholic acid (TCA) or 2.5  $\mu$ M GW 4064 (GW) (filled bars). For the determination of cyclophilin 18S-RNA was used as housekeeping gene. Expression levels were related to the vehicle-treated control siRNA group (control). All experiments were performed at least in triplicates. Data are given as means  $\pm$  SD. \* Significantly different from controls, at least  $p < 0.05$ .
